# Supplementary material for: Structural evaluation and catalytic performance of nano-Au supported on nanocrystalline Ce0.9Fe0.1O2−δ solid solution for oxidation of carbon monoxide and benzylamine
Source: Royal Society of Chemistry journal article supplement (doi:10.1039/c4ra07450e), 2014-01-01
Supplement: c4ra07450e1.pdf [file c4ra07450e1.pdf]

## **Structural evaluation and catalytic performance of nano-Au supported on nanocrystalline $\text{Ce}_{0.9}\text{Fe}_{0.1}\text{O}_{2-\delta}$ solid solution for oxidation of carbon monoxide and benzylamine**

**P. Sudarsanam,<sup>a,b</sup> P. R. Selvakannan,<sup>b</sup> Sarvesh K. Soni,<sup>b</sup> Suresh K. Bhargava,<sup>\*b</sup> and Benjaram M. Reddy<sup>\*a</sup>**

<sup>a</sup> Inorganic and Physical Chemistry Division, CSIR–Indian Institute of Chemical Technology, Uppal Road, Hyderabad – 500 007, India.

<sup>b</sup> Centre for Advanced Materials and Industrial Chemistry (CAMIC), School of Applied Sciences, RMIT University, Melbourne VIC 3001, Australia.

<sup>\*</sup>Author to whom correspondence should be addressed. Phone: +91 40 2719 3510. Fax: +91 40 2716 0921. E-mail: [bmreddy@iict.res.in](mailto:bmreddy@iict.res.in); [suresh.bhargava@rmit.edu.au](mailto:suresh.bhargava@rmit.edu.au)

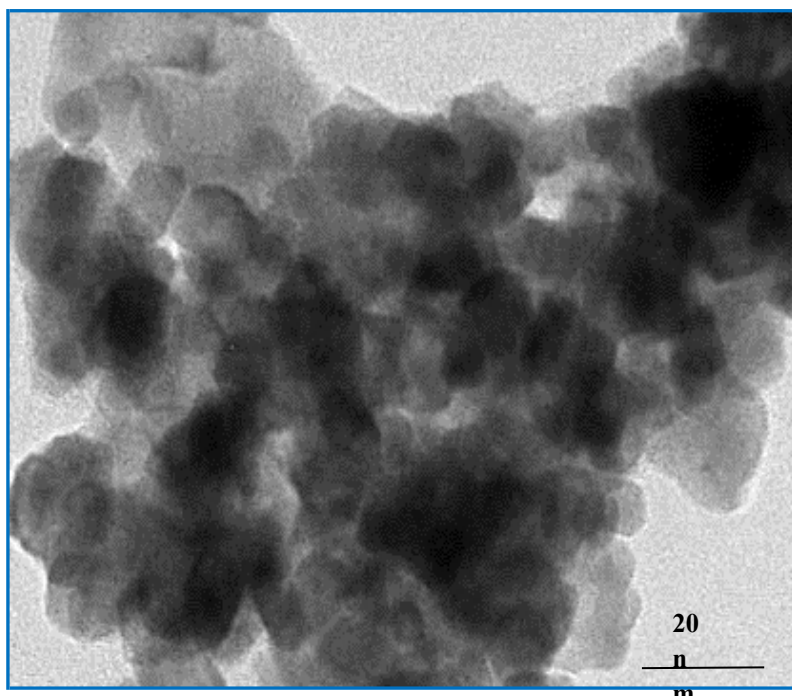

**Fig. S1** TEM image of the  $\text{CeO}_2\text{-Fe}_2\text{O}_3$  sample.

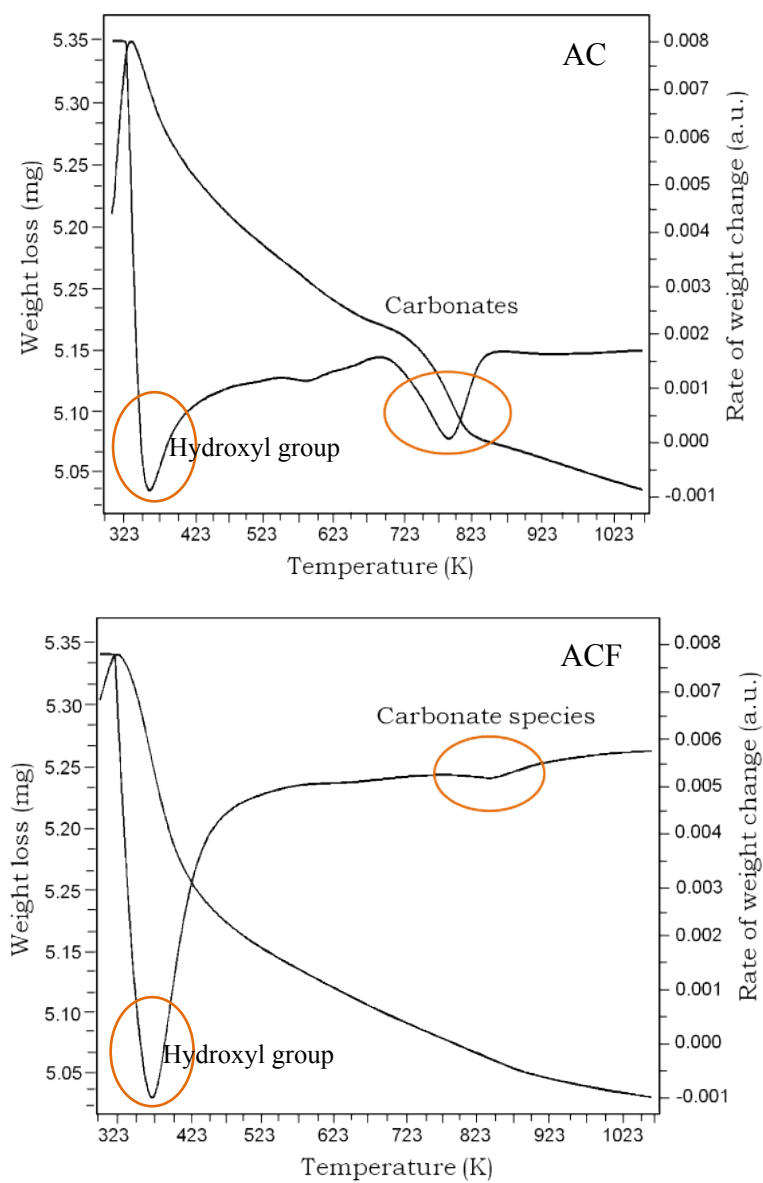

**Fig. S2** TG-DTA profiles of the Au/CeO<sub>2</sub> (AC) and Au/CeO<sub>2</sub>-Fe<sub>2</sub>O<sub>3</sub> catalysts.

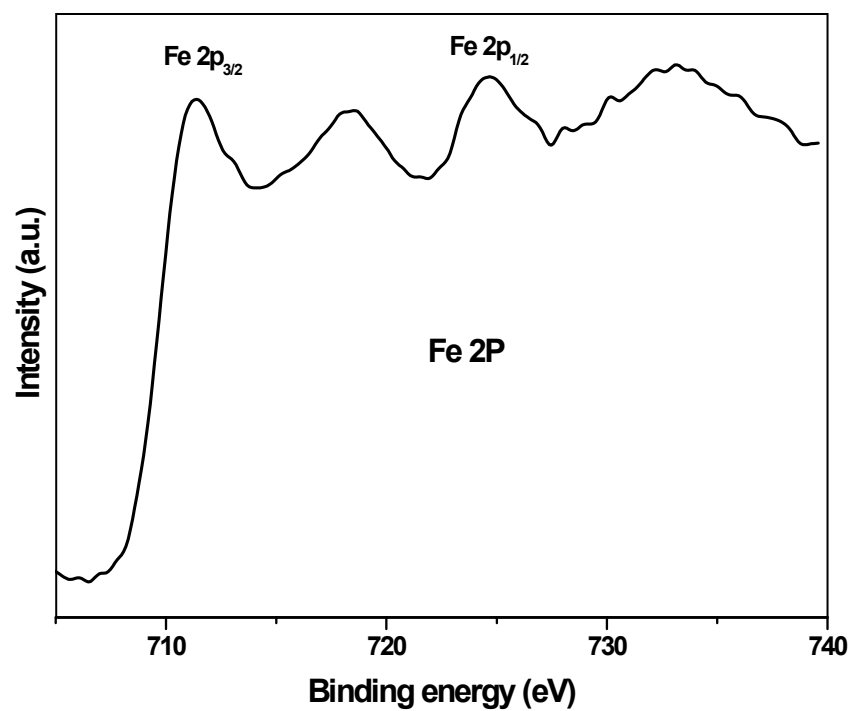

**Fig. S3** Fe 2p XPS spectrum of the CeO<sub>2</sub>-Fe<sub>2</sub>O<sub>3</sub> sample.
